# Supplementary material
Source: PubMed Central journal article supplement (PMC4817703)
Supplement: ismej2014179x1.pdf [file ismej2014179x1.pdf]

**Table S1.** Detected genera that are linked to butyrate producers. For functional gene IDs associated with individual taxa see fungene (<http://fungene.cme.msu.edu>) and Vital et al (2013). The applied gene-association should not be regarded as strict for those taxa as several genera contain both *but* and *buk* as well as non-butyrate producing members (see main text). Thus, this type of analysis cannot substitute for a functional gene-targeted approach, but is used here for global comparisons. Individual (gene) categories are indicated: butyryl-CoA:acetate CoA-transferase (*but*), butyrate kinase (*buk*), alternative transferases (*other*) and amino acids fed butyrate-producing pathways (*aa*). Brachyspir. (*Brachyspiraceae*), Clost.IS\_XI (*Clostridiales\_Incertae\_Sedis\_XI*), Oxalobact. (*Oxalobacteraceae*).

|                                                                                                                                                                                                                                                                                                                                                                                                                                                                                                                                                                                                                                                                                                                                                           |                                                                                                                                                                                                                                                                                                                                                                                                                                                                                                                                                                                                                                                                                                                                                                                               |
|-----------------------------------------------------------------------------------------------------------------------------------------------------------------------------------------------------------------------------------------------------------------------------------------------------------------------------------------------------------------------------------------------------------------------------------------------------------------------------------------------------------------------------------------------------------------------------------------------------------------------------------------------------------------------------------------------------------------------------------------------------------|-----------------------------------------------------------------------------------------------------------------------------------------------------------------------------------------------------------------------------------------------------------------------------------------------------------------------------------------------------------------------------------------------------------------------------------------------------------------------------------------------------------------------------------------------------------------------------------------------------------------------------------------------------------------------------------------------------------------------------------------------------------------------------------------------|
| <p><b>but</b></p> <p><b>Lachnospiraceae</b><br/> <i>Clostridium XIVa</i><br/> <i>Roseburia</i><br/> <i>Anaerostipes</i><br/> <i>Butyrivibrio</i><br/> <i>Pseudobutyrvibrio</i><br/> <i>Lachnospiraceae_incertae_sedis</i></p> <p><b>Ruminococcaceae</b><br/> <i>Butyricoccus</i><br/> <i>Anaerococcus</i><br/> <i>Faecalibacterium</i></p> <p><b>Acidaminococcaceae</b><br/> <i>Acidaminococcus</i></p> <p><b>Veillonellaceae</b><br/> <i>Megasphaera</i></p> <p><b>Eubacteriaceae</b><br/> <i>Anaerofustis</i><br/> <i>Eubacterium</i><br/> <i>Pseudaminobacter</i></p> <p><b>Spirochaetaceae</b><br/> <i>Treponema</i></p> <p><b>Brachyspir./Clost.IS_XI/Oxalobact.</b><br/> <i>Peptoniphilus</i><br/> <i>Brachyspira</i><br/> <i>Oscillibacter</i></p> | <p><b>other</b></p> <p><b>Erysipelotrichaceae</b><br/> <i>Clostridium XVIII</i><br/> <i>Erysipelotrichaceae_incertae_sedis</i></p> <p><b>Carnobacteriaceae</b><br/> <i>Carnobacterium</i></p> <p><b>buk</b></p> <p><b>Clostridiaceae</b><br/> <i>Clostridium sensu stricto</i></p> <p><b>Peptostreptococcaceae</b><br/> <i>Clostridium XI</i></p> <p><b>Ruminococcaceae</b><br/> <i>Subdoligranulum</i><br/> <i>Anaerotruncus</i></p> <p><b>Lachnospiraceae</b><br/> <i>Coprococcus</i><br/> <i>Shuttleworthia</i></p> <p><b>aa</b></p> <p><b>Porphyromonadaceae</b><br/> <i>Odoribacter</i><br/> <i>Porphyromonas</i><br/> <i>Butyricimonas</i><br/> <i>Propionibacterium</i></p> <p><b>Fusobacteriaceae</b><br/> <i>Fusobacterium</i></p> <p><b>Rikenellaceae</b><br/> <i>Alistipes</i></p> |
|-----------------------------------------------------------------------------------------------------------------------------------------------------------------------------------------------------------------------------------------------------------------------------------------------------------------------------------------------------------------------------------------------------------------------------------------------------------------------------------------------------------------------------------------------------------------------------------------------------------------------------------------------------------------------------------------------------------------------------------------------------------|-----------------------------------------------------------------------------------------------------------------------------------------------------------------------------------------------------------------------------------------------------------------------------------------------------------------------------------------------------------------------------------------------------------------------------------------------------------------------------------------------------------------------------------------------------------------------------------------------------------------------------------------------------------------------------------------------------------------------------------------------------------------------------------------------|

**Table S2.** Main ingredients and major enrichments of animal diets.

| SampleID          | Diet | Main Ingredients                                                                                                  | Major Enrichments                                                                |
|-------------------|------|-------------------------------------------------------------------------------------------------------------------|----------------------------------------------------------------------------------|
| BaldEagle         | C    | Natural Balance® Meat eating bird diet, fish, mice, rat, rabbit                                                   |                                                                                  |
| Duck              | H    | Corn, scratch, Mazuri® Waterfowl Maintenance                                                                      | Crickets                                                                         |
| Mousebird         | H    | Fruit and Mazuri® Softbill                                                                                        |                                                                                  |
| Hawk              | C    | Nebraska Brand® Bird of Prey diet                                                                                 | Prey items                                                                       |
| Peafowl           | O    | Corn, scratch, Mazuri® Waterfowl Maintenance, bugs, worms                                                         | Produce, bugs, worms                                                             |
| KingVulture       | C    | Fish, Nebraska Brand® Premium Meat, rabbit                                                                        | Raw eggs                                                                         |
| Penguin           | C    | Fish                                                                                                              |                                                                                  |
| Ostrich           | O    | Ratite pellets                                                                                                    | Produce, corn, starch, browsw                                                    |
| Tenrec1           | C    | Insecticore diet, meal worms, cricket, Science Diet® Feline Adult Lite, apple                                     |                                                                                  |
| Tenrec2           | C    | Insecticore diet, meal worms, cricket, Science Diet® Feline Adult Lite, apple                                     |                                                                                  |
| GuineaHog         | H    | Grass, hay, Mazuri® Mini-pig Elder                                                                                | Omolene® Sweet Feed, oats, scratch, mealworms, eggs, bread, cereal               |
| Dog1              | O    | Wellness® natural dry dog food                                                                                    |                                                                                  |
| Dog2              | O    | Wellness® natural dry dog food                                                                                    |                                                                                  |
| ArcticFox1        | C    | Natural Balance® Carnivore Diet, Science Diet® K-9 Small Bites dry, rib bone, dog food                            | Frozen fish, live fish, deer meat, eggs, dog treats, peanut butter tubes         |
| ArcticFox2        | C    | Natural Balance® Carnivore Diet, Science Diet® K-9 Small Bites dry, rib bone, dog food                            | Frozen fish, live fish, deer meat, eggs, dog treats, peanut butter tubes         |
| AfricanLion       | C    | Carnivore diet, rib bone, femur bone                                                                              | Herring, rabbits, venison, chicken, melon, pumpkin                               |
| Tiger             | C    | Nebraska Brand® Exotic Feline Diet                                                                                |                                                                                  |
| Meerkat           | O    | Insectivore diet, cat food, crickets, mealworms, hard boiled eggs, fruit, veggies, greens, fuzzy mice             | Nuts, seeds, grains, cereal, pasta, dried fruit, honey                           |
| Ferret            | C    | Meat, eggs, pinky mice, bugs                                                                                      |                                                                                  |
| RiverOtter        | C    | Fish, Science Diet® Active Longevity                                                                              | Earthworms, mice, carrots, apples, pumpkin                                       |
| RedPanda          | H    | Banana, apple, Marion™ Leafeater diet, Marion™ Leafeater Lemur Biscuits, bamboo                                   |                                                                                  |
| GrizzlyBear       | C    | Mazuri® Omnivore 5635, produce, bones                                                                             |                                                                                  |
| GiantPanda1       | H    | Bamboo                                                                                                            |                                                                                  |
| GiantPanda2       | H    | Bamboo                                                                                                            |                                                                                  |
| Binturong         | O    | Mazuri® Leaf Eater Sticks, dry dog food, banana, fruit, half egg                                                  |                                                                                  |
| Armadillo         | O    | Insectivore pellets, potato, apple, grape, waxworm                                                                | Crickets                                                                         |
| Opossum           | O    | Veggies, fruit, Science Diet® Canine Small Bites, adult mouse whole                                               | Produce                                                                          |
| Rabbit1           | H    | Oxbow basix bunny/T pellets, hay, fresh produce                                                                   |                                                                                  |
| Rabbit2           | H    | Oxbow basix bunny/T pellets, hay, fresh produce                                                                   |                                                                                  |
| Donkey            | H    | Hay, mineral pellet                                                                                               |                                                                                  |
| CottontopTamarin  | O    | Mazuri® Marmoset Jelly, banana, Mazuri® High Protein Primate Stick, fruit, bugs                                   |                                                                                  |
| GoldenLionTamarin | O    | Tamarin diet, waxworms, mealworms                                                                                 | Peanut butter, honey, dried fruit, cereal, cooked pasta, popcorn, yogurt         |
| Human1            | O    | North american omnivore diet                                                                                      |                                                                                  |
| Human2            | O    | North american omnivore diet                                                                                      |                                                                                  |
| Mandril           | O    | Mazuri® Primate Browse Biscuits, glucosamine                                                                      |                                                                                  |
| MongooseLemur     | O    | Mazuri® Primate Browse Biscuits, greens                                                                           | <i>Peanut butter, honey, dried fruit, cereal, cooked pasta, popcorn, yogurt,</i> |
| RedruffeledLemur  | O    | Mazuri® Primate Browse Biscuits, greens                                                                           | <i>crickets, earthworms, bread, mealworms, waxworms</i>                          |
| RingtailedLemur   | O    | Mazuri® Primate Browse Biscuits, greens, browse, flowers, fruit, veggies                                          | <i>(for all Lemurs and SpiderMonkey)</i>                                         |
| SpiderMonkey      | O    | Marion™ Leafeater Lemur Biscuit, Mazuri® New World Primate diet, fruit, veggie                                    |                                                                                  |
| GuineaPig         | H    | Hay, Kaytee® Timothy Complete Fiber diet                                                                          |                                                                                  |
| PatagonianCavy    | H    | Grass, hay, Mazuri® Primate Browse Biscuits, greens, veggies, guinea pig diet, seeds, scratch, rodent chow, fruit |                                                                                  |
| Chinchilla        | H    | Hay, Mazuri® Chin Chow, cheerios, vegetables, fresh and dried fruit, grains                                       |                                                                                  |
| Porcupine         | H    | Mazuri® Primate Browse Biscuits, Science Diet® Active Longevity                                                   | Browse, pumpkins, melons, corn stalks, corn on the cob, scents, spices           |
| Mouse             | O    | Kaytee® healthy support diet                                                                                      |                                                                                  |
| Rat               | O    | Kaytee® healthy support diet                                                                                      |                                                                                  |
| Treeshrew         | O    | Insectivore diet, cat food, mixed fruit, veggies, bugs                                                            |                                                                                  |
| BeardedDragon     | O    | Greens topped with fruit or vegetables, insects                                                                   | Fuzzy mice                                                                       |
| MilkSnake         | C    | Dead Fuzzies (mice)                                                                                               |                                                                                  |
| RatSnake          | C    | Dead Fuzzies (mice)                                                                                               |                                                                                  |
| Chuckwalla        | H    | Greens, carrot, potato, beet, and seed                                                                            |                                                                                  |
| Skink             | O    | Produce, crickets, worms, pinky mouse                                                                             |                                                                                  |
| BoxTurtle         | O    | Fruit, vegetables, earthworms, crickets                                                                           |                                                                                  |
| Tortoise1         | H    | Diced greens, carrot, potato, tortoise chow pellets, hay/grass mix                                                | Fruits                                                                           |
| Tortoise2         | H    | Diced greens, carrot, potato, tortoise chow pellets, hay/grass mix                                                | Fruits                                                                           |

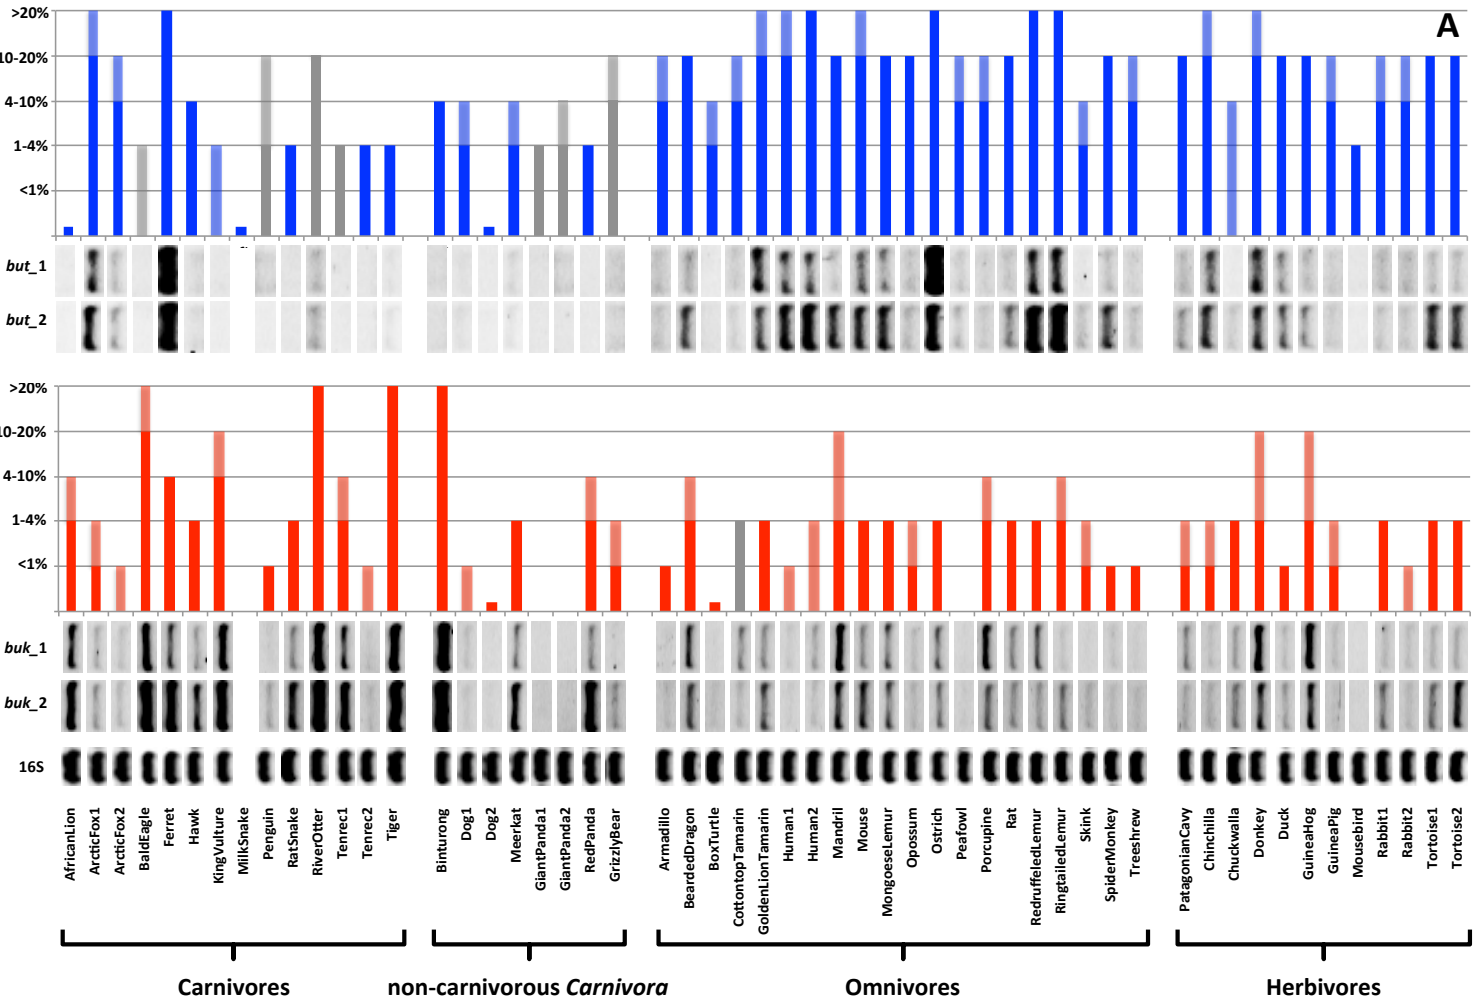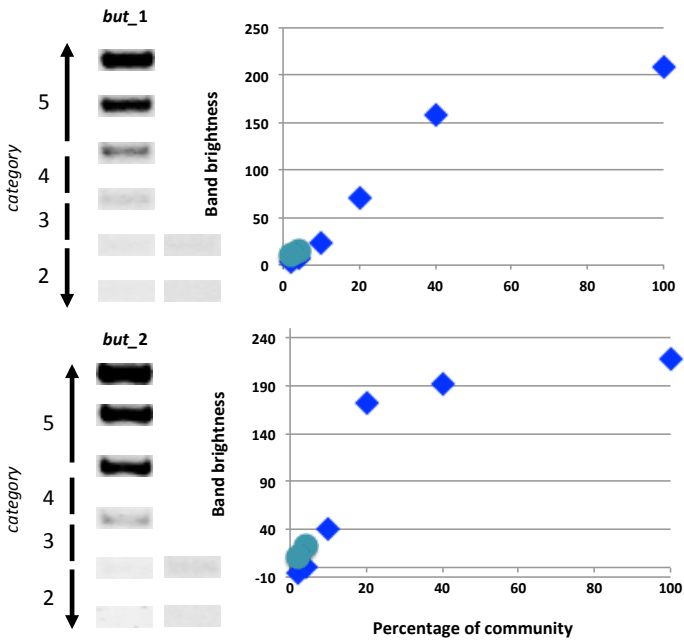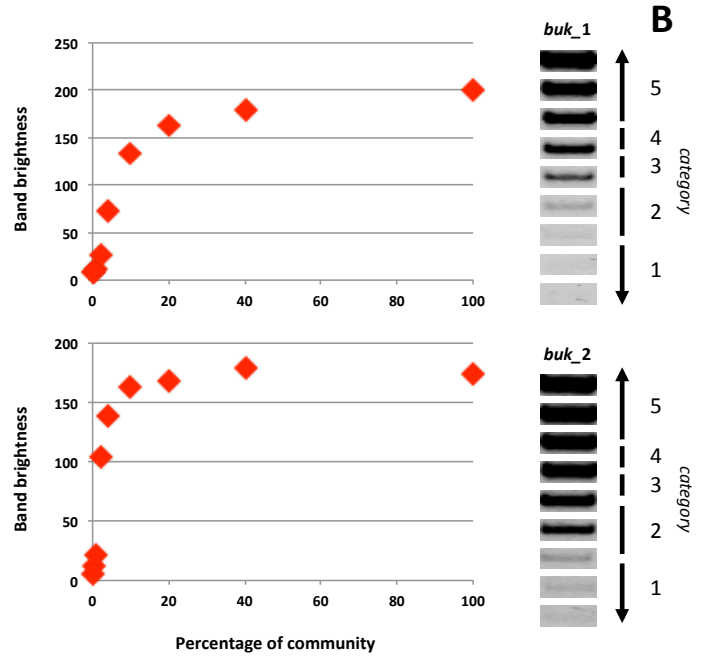

**Figure S1.** Estimating gene abundances of butyryl-CoA:acetate CoA-transferase (blue) and butyrate kinase (red) for all samples (panel A). Band intensities of PCR products were categorized into six distinct brightness groups (0-5) based on established standard curves from reference genomes (shown in panel B; gel background was subtracted from intensity values). Two experiments were performed for each gene. In order to increase detection confidence for *but* at low intensities two reference samples were analyzed at lowest concentrations and median values were used for calculations. Intensities of samples that were categorized as zero, but yielded sequences after re-amplification, are indicated as well (bars exhibiting 0.2 intensity). Samples where the majority of reads ( $\geq 97\%$ ) were filtered out during the pipelining (see material and methods) are marked grey (also grizzly bear is marked grey as only 12 % of reads were considered as real *but*). For more details see materials and methods. No data is available for milk snake. Since no bands were visible for both genes in previous experiments (16S *rRNA* amplification displayed a bright band) we categorized estimated gene abundance as 0 % for both genes in this animal.

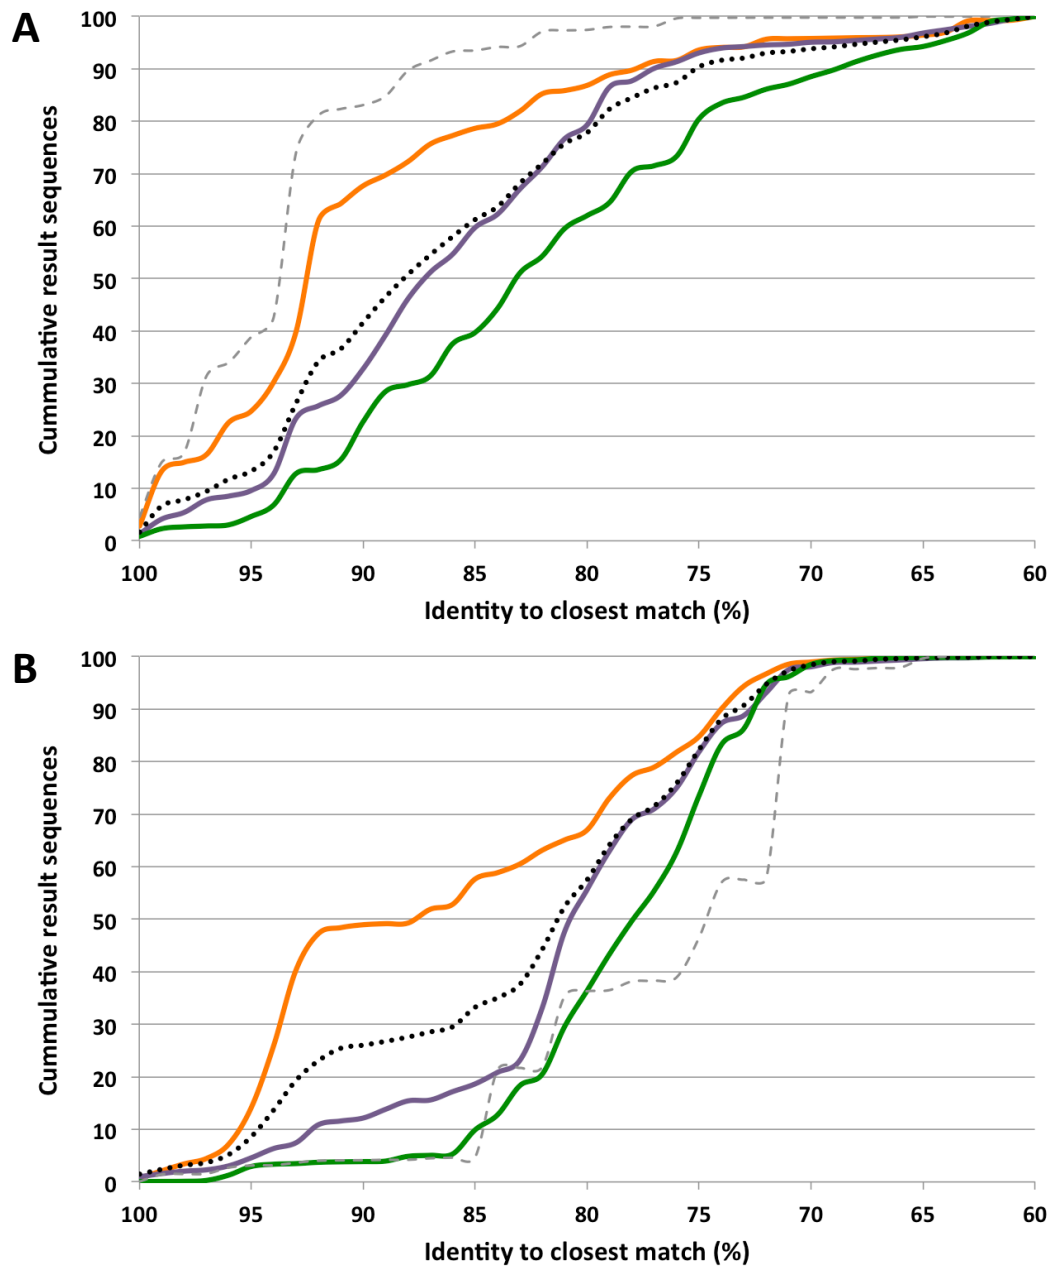

**Figure S2.** Identity values of all obtained sequences to a reference (on protein level) for butyryl-CoA:acetate CoA-transferase (A) and butyrate kinase (B) is shown. Individual diet groups are indicated as orange (carnivores including non-carnivorous *Carnivora*), violet (omnivores), green (herbivores), grey-dashed line (human) and black-dotted line (all groups together). The data is displayed as a cumulative percentage of sequence identities to a reference gene in our database.

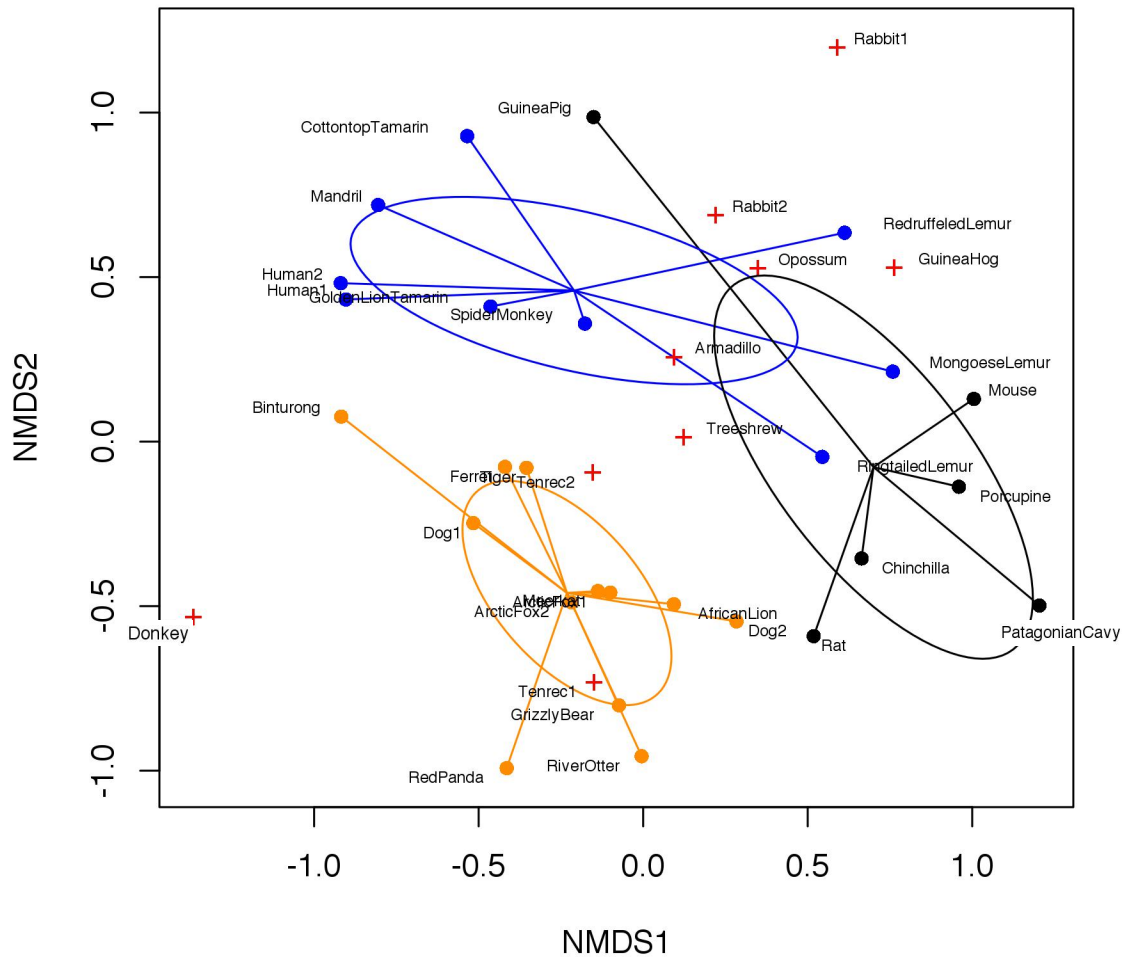

**Figure S3.** Non-metric multidimensional scaling (NMDS) of combined gene data (butyryl-CoA:acetate CoA-transferase and butyrate kinase) based on multi-linkage clustering (5% cut-off on protein level) for *Mammalia* only is shown. Individual orders are indicated as orange (*Carnivora*), blue (*Primates*) and black (*Rodentia*). Other subjects are displayed as well.

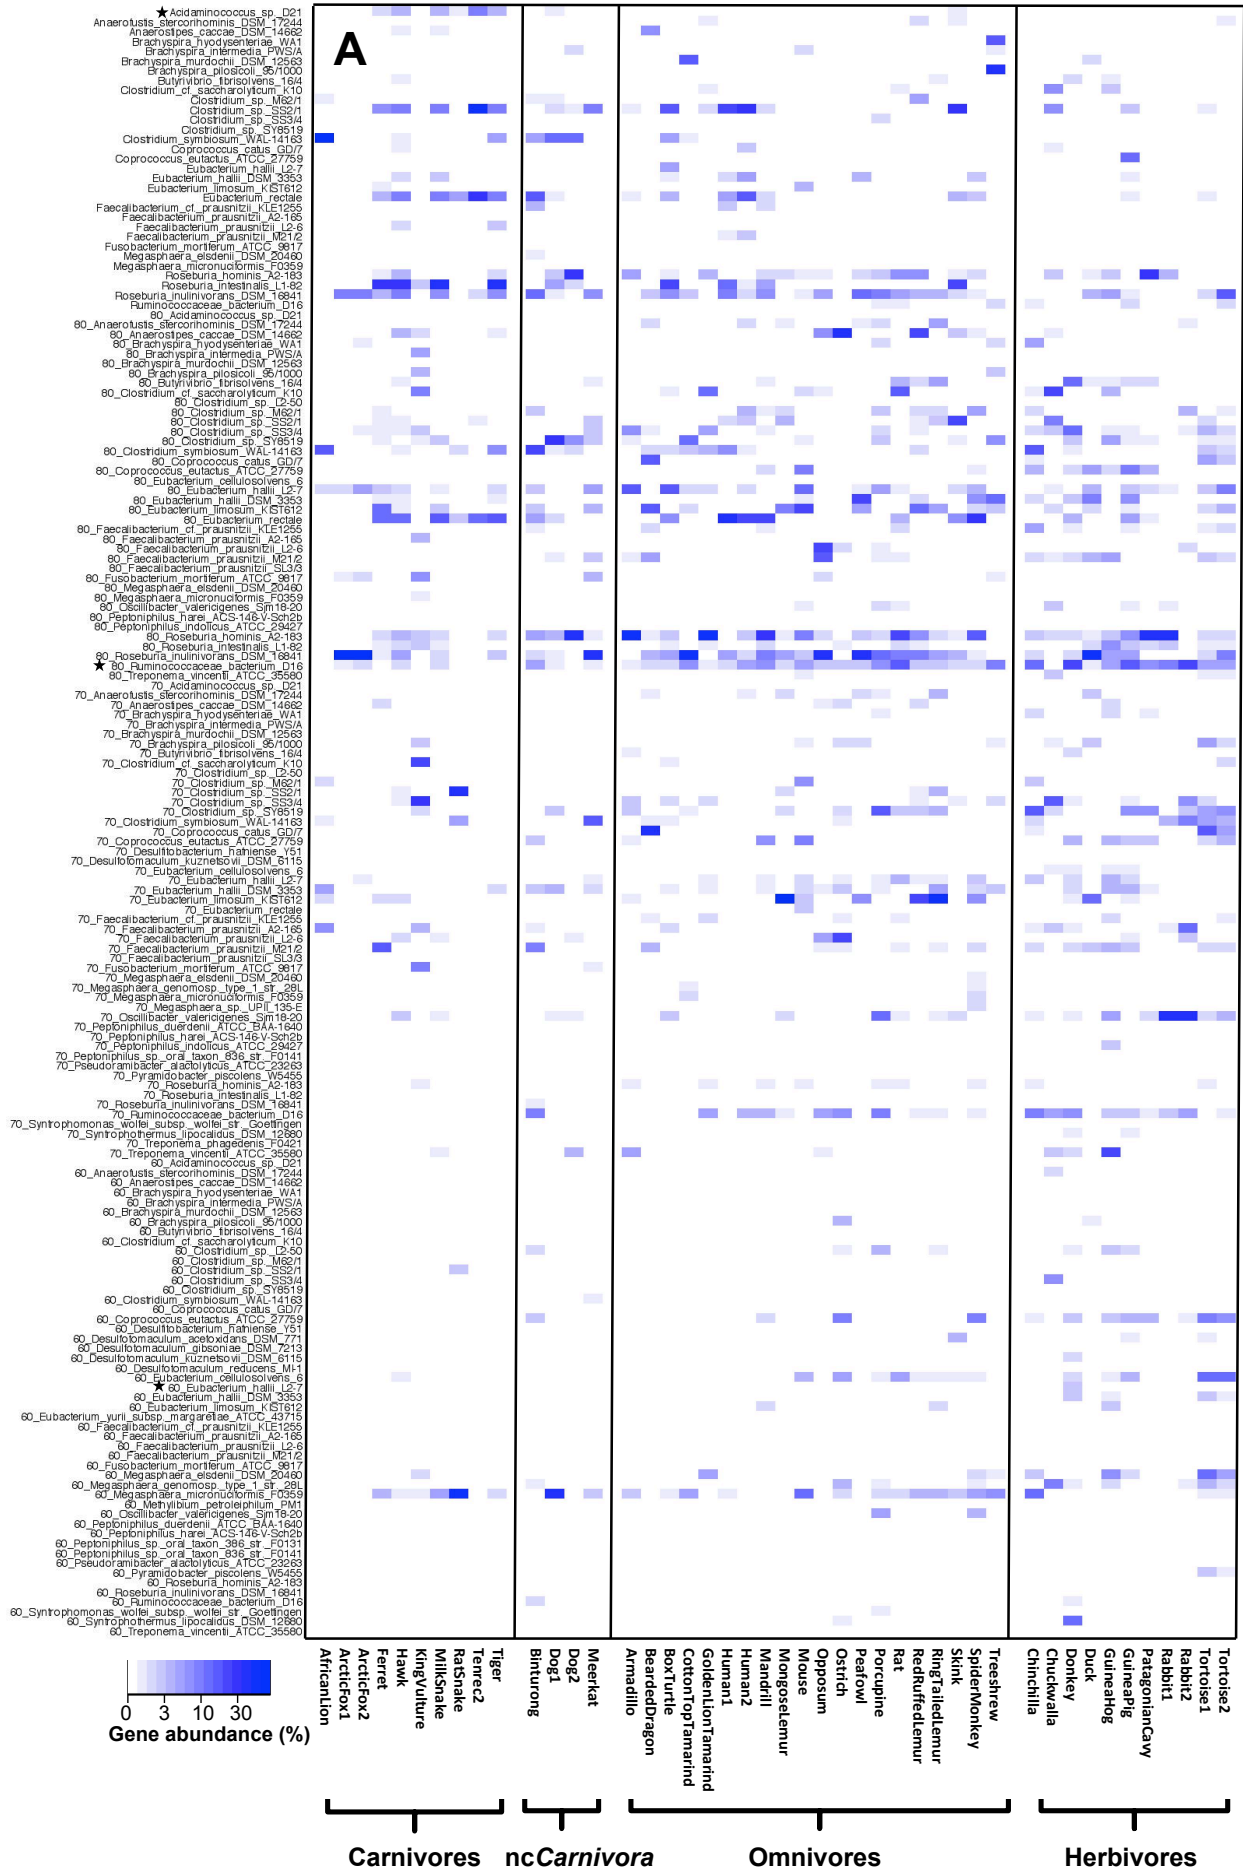

- Clostridium\_acetobutylicum
- Clostridium\_bartlettii\_DSM\_16795
- Clostridium\_beijerinckii\_NCIMB\_8052
- Clostridium\_botulinum\_B\_str\_Eklund\_17B
- Clostridium\_botulinum\_H04402\_065
- Clostridium\_butyricum
- Clostridium\_cellulovorans\_743B
- Clostridium\_hiranonis\_DSM\_13275
- ★ Clostridium\_perfringens
- Clostridium\_sp.\_L2-50
- Clostridium\_tetani\_E88
- Coproccoccus\_sp.\_ART55/1
- Eubacterium\_ventriosum\_ATCC\_27560
- Lachnospiraceae\_bacterium\_3\_1\_57FAA\_CT1
- Subdoligranulum\_variabile\_DSM\_15176
- 80\_Butyrvibrio\_crossotus\_DSM\_2876
- 80\_Butyrvibrio\_proteoclasticus\_B316
- 80\_Clostridium\_bartlettii\_DSM\_16795
- 80\_Clostridium\_beijerinckii\_NCIMB\_8052
- 80\_Clostridium\_botulinum\_A3\_str\_Loch\_Maree
- 80\_Clostridium\_botulinum\_B\_str\_Eklund\_17B
- 80\_Clostridium\_botulinum\_E1\_str\_BoNT\_E\_Beluga
- 80\_Clostridium\_botulinum\_F\_str\_230613
- 80\_Clostridium\_botulinum\_H04402\_065
- 80\_Clostridium\_butyricum
- 80\_Clostridium\_carboxidivorans\_P7
- ★ 80\_Clostridium\_difficile\_R20291
- 80\_Clostridium\_hiranonis\_DSM\_13275
- ★ 80\_Clostridium\_perfringens
- 80\_Clostridium\_sp.\_L2-50
- 80\_Clostridium\_sporogenes\_ATCC\_15579
- 80\_Clostridium\_tetani\_E88
- 80\_Coproccoccus\_sp.\_ART55/1
- 80\_Eubacterium\_ventriosum\_ATCC\_27560
- 80\_Lachnospiraceae\_bacterium\_3\_1\_57FAA\_CT1
- 80\_Peptostreptococcus\_stomatis\_DSM\_17678
- 80\_Shuttleworthia\_satelles\_DSM\_14600
- 80\_Subdoligranulum\_variabile\_DSM\_15176
- 70\_Butyrvibrio\_crossotus\_DSM\_2876
- 70\_Butyrvibrio\_proteoclasticus\_B316
- 70\_Clostridium\_acetobutylicum
- 70\_Clostridium\_bartlettii\_DSM\_16795
- 70\_Clostridium\_beijerinckii\_NCIMB\_8052
- 70\_Clostridium\_botulinum\_A3\_str\_Loch\_Maree
- 70\_Clostridium\_botulinum\_B\_str\_Eklund\_17B
- 70\_Clostridium\_botulinum\_Bf
- 70\_Clostridium\_botulinum\_E1\_str\_BoNT\_E\_Beluga
- 70\_Clostridium\_botulinum\_F\_str\_230613
- 70\_Clostridium\_botulinum\_H04402\_065
- 70\_Clostridium\_butyricum
- 70\_Clostridium\_carboxidivorans\_P7
- 70\_Clostridium\_cellulovorans\_743B
- 70\_Clostridium\_difficile\_R20291
- 70\_Clostridium\_hiranonis\_DSM\_13275
- 70\_Clostridium\_perfringens
- 70\_Clostridium\_sp.\_L2-50
- 70\_Clostridium\_sporogenes\_ATCC\_15579
- 70\_Clostridium\_tetani\_E88
- 70\_Coproccoccus\_sp.\_ART55/1
- 70\_Eubacterium\_ventriosum\_ATCC\_27560
- 70\_Lachnospiraceae\_bacterium\_3\_1\_57FAA\_CT1
- 70\_Peptostreptococcus\_stomatis\_DSM\_17678
- 70\_Shuttleworthia\_satelles\_DSM\_14600
- 70\_Subdoligranulum\_variabile\_DSM\_15176
- 60\_Butyrvibrio\_crossotus\_DSM\_2876
- 60\_Butyrvibrio\_proteoclasticus\_B316
- 60\_Clostridium\_acetobutylicum
- 60\_Clostridium\_bartlettii\_DSM\_16795
- 60\_Clostridium\_beijerinckii\_NCIMB\_8052
- 60\_Clostridium\_botulinum\_A3\_str\_Loch\_Maree
- 60\_Clostridium\_botulinum\_B\_str\_Eklund\_17B
- 60\_Clostridium\_botulinum\_F\_str\_230613
- 60\_Clostridium\_botulinum\_H04402\_065
- 60\_Clostridium\_butyricum
- 60\_Clostridium\_carboxidivorans\_P7
- 60\_Clostridium\_cellulovorans\_743B
- 60\_Clostridium\_difficile\_R20291
- 60\_Clostridium\_hiranonis\_DSM\_13275
- 60\_Clostridium\_perfringens
- 60\_Clostridium\_sp.\_L2-50
- 60\_Clostridium\_sporogenes\_ATCC\_15579
- 60\_Clostridium\_tetani\_E88
- 60\_Coproccoccus\_sp.\_ART55/1
- 60\_Eubacterium\_ventriosum\_ATCC\_27560
- 60\_Lachnospiraceae\_bacterium\_3\_1\_57FAA\_CT1
- 60\_Shuttleworthia\_satelles\_DSM\_14600
- 60\_Subdoligranulum\_variabile\_DSM\_15176

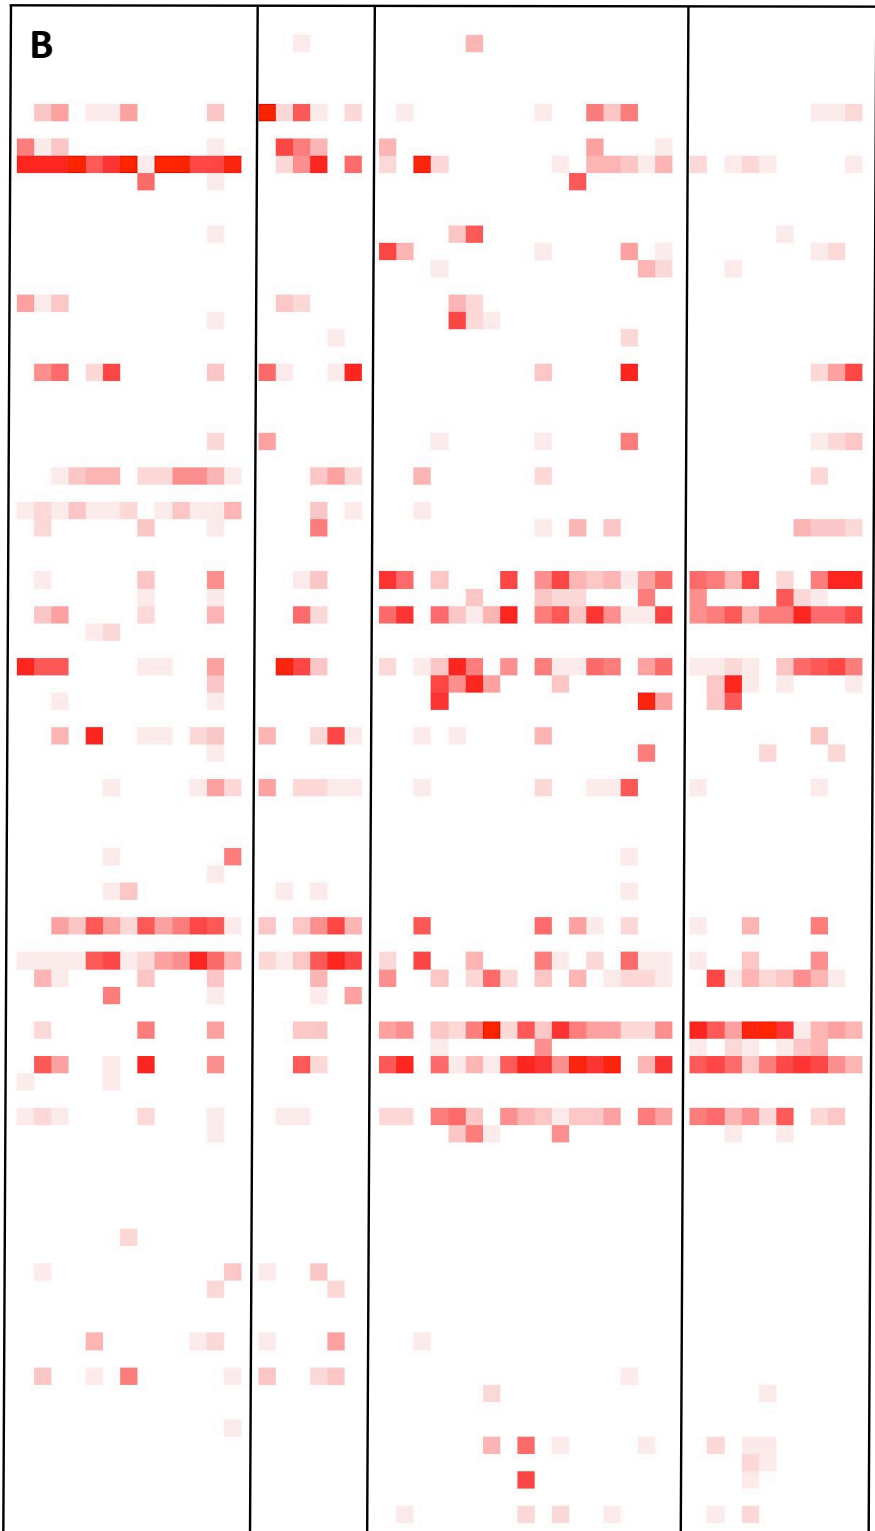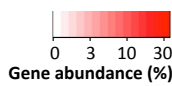

Tortoise2  
 Tortoise1  
 Rabbit2  
 Rabbit1  
 PatagonianCavey  
 GuineaPig  
 GuineaHog  
 Duck  
 Donkey  
 Chinchilla  
 TreeShaw  
 SpiderMonkey  
 Skink  
 RingTailedLemur  
 Rat  
 Porcupine  
 Ostrich  
 Opposum  
 Mouse  
 MongooseLemur  
 Mandrill  
 Human2  
 Human1  
 GoldenlionTamarin  
 BoxTurtle  
 BeardedDragon  
 Armadillo  
 GrizzlyBear  
 Redpanda  
 Meerkat  
 Dog2  
 Dog1  
 Binturong  
 Tiger  
 Tenrec2  
 Tenrec1  
 RiverOtter  
 RedTailedHawk  
 Ratsnake  
 Peruvian  
 KingVulture  
 Ferret  
 BaldEagle  
 ArcticFox2  
 ArcticFox1  
 Africanlion

**Carnivores**      **ncCarnivora**      **Omnivores**      **Herbivores**



**Figure S4.** FrameBot closest match analysis of butyryl-CoA:acetate CoA-transferase (A: blue) and butyrate kinase (B: red) for all samples is shown. Closest match results were separated into distinct categories based on their percent identity to a reference gene (bins containing 10% identity ranges were created, where the number preceding the reference name specifies the lowest identity in that group; e.g. “70\_reference name” is the combined percentage of all sequences that show 70%-79% identity to that reference; no number indicates categories from 90%-100% identity). nc*Carnivora*: non-carnivorous *Carnivora*. A black star indicates taxa significantly different ( $p < 0.05$ ) between diet groups (non-carnivorous *Carnivora* were excluded from the analysis).

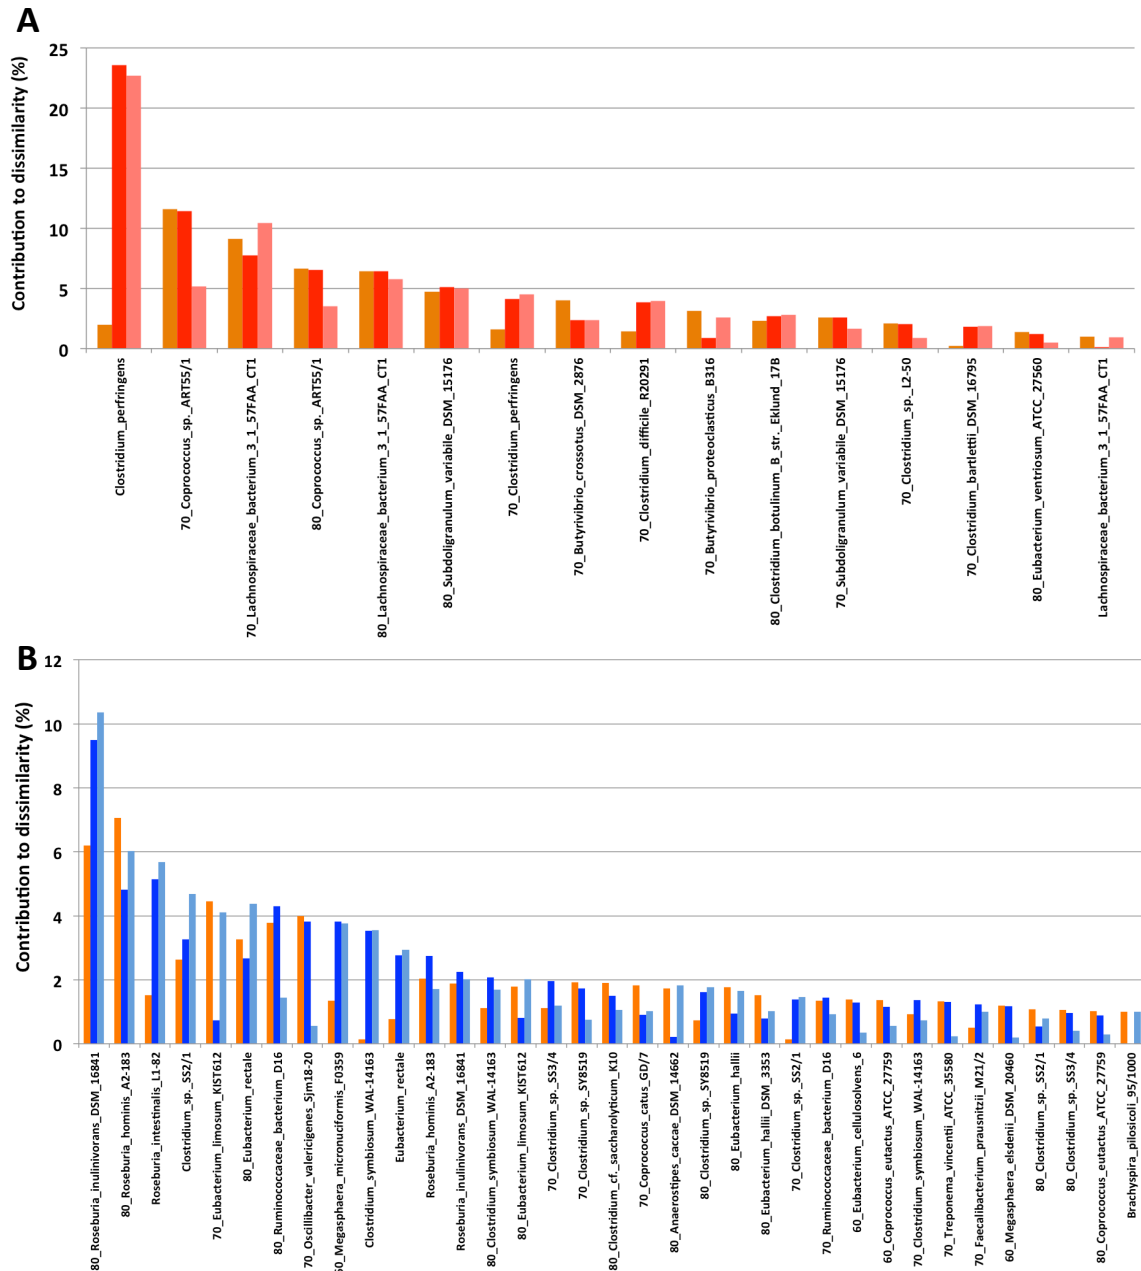

**Figure S5.** Simper analysis of butyryl-CoA:acetate CoA-transferase (A) and butyrate kinase (B) is shown. Analysis comparing herbivores/omnivores (orange bar), carnivores/herbivores (red, blue) and carnivores/omnivores (light red, light blue) are indicated. Only taxa contributing more than 1 % are displayed. Non-carnivorous *Carnivora* were excluded from the analysis.

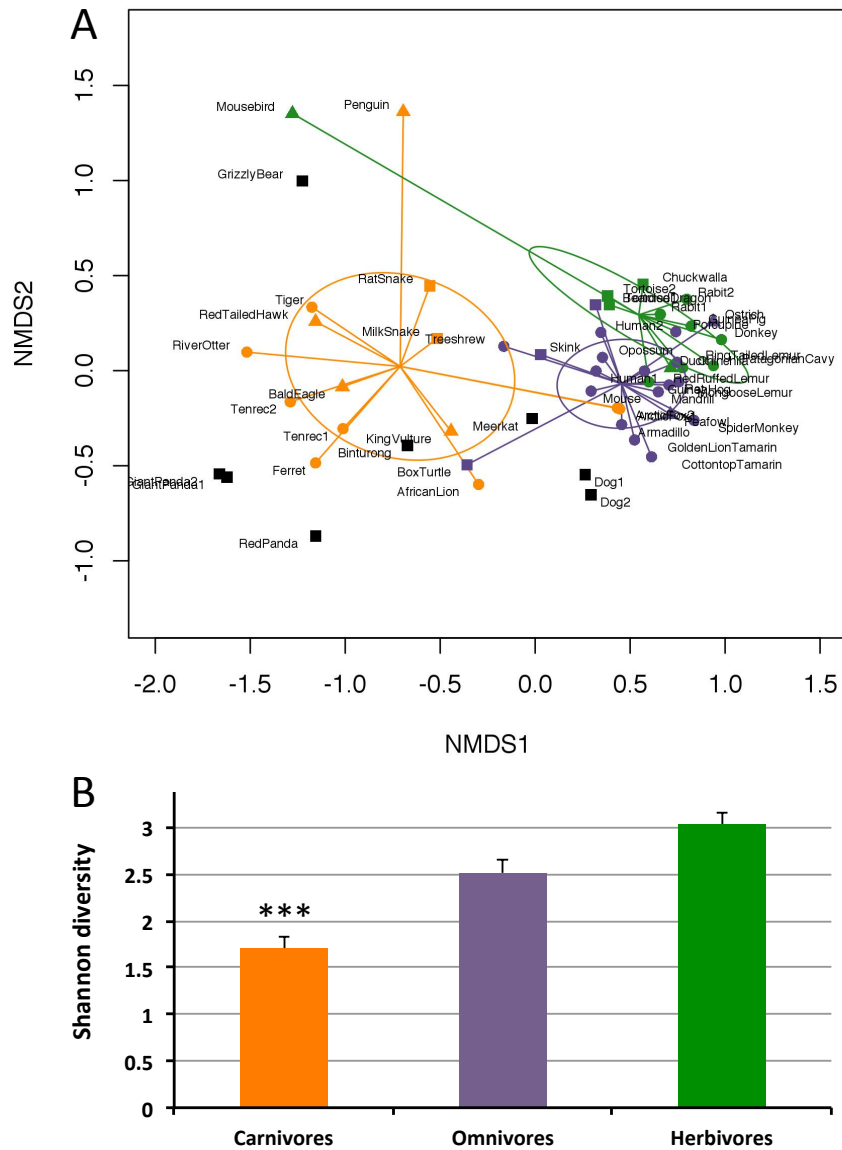

**Figure S6.** In panel A non-metric multidimensional scaling (NMDS) of entire bacterial 16S *rRNA* data is shown (stress = 0.13). Individual diet groups are indicated as orange (carnivores), violet (omnivores) and green (herbivores). Distinct *Vertebrate* classes are specified with symbols. Non-carnivorous *Carnivora* are presented as black squares. Ellipses represent the standard deviations of points. Diet was revealed as a significant factor ( $p <$

0.01 based on permutational anova analysis). Shannon diversity is indicated in panel B where error bars indicate standard error of the mean. \*\*\*:  $p < 0.01$ .

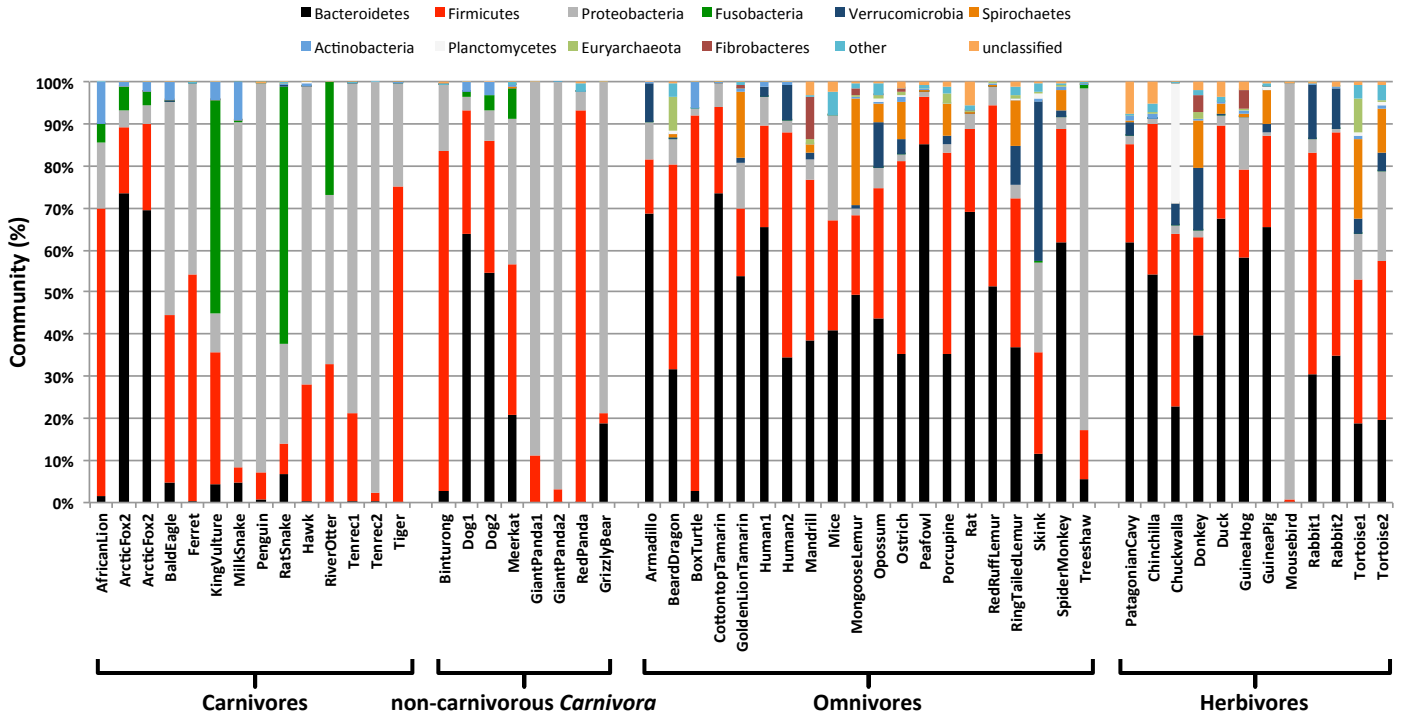

Figure S7 16S rRNA analysis on phylum level for all samples is shown.
